# Supplementary material for: In vivo imaging of Lactococcus lactis, Lactobacillus plantarum and Escherichia coli expressing infrared fluorescent protein in mice
Source: PubMed Central journal article supplement (PMC4650289; doi:10.1186/s12934-015-0376-4), 2015-11-14

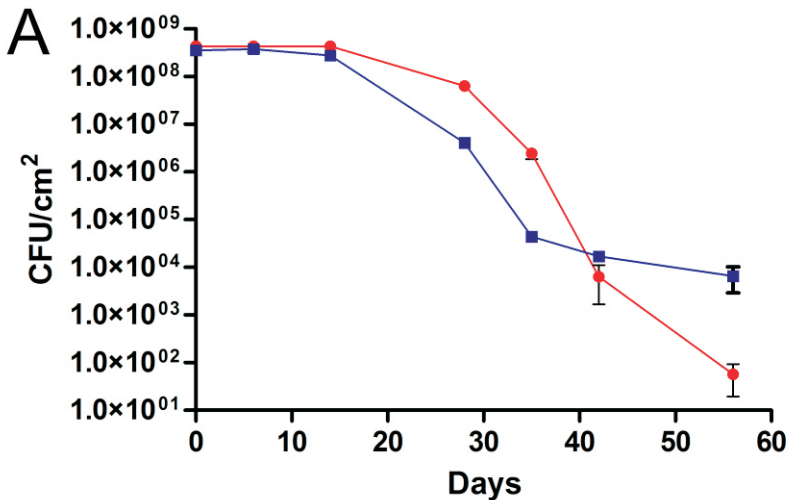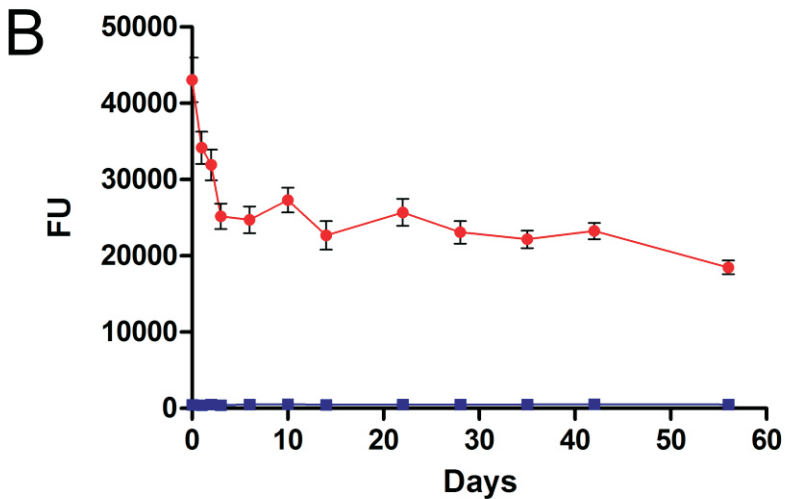

Supplement: 12934_2015_376_MOESM1_ESM.pdf [file 12934_2015_376_MOESM1_ESM.pdf]
